# Supplementary material for: Cost-effectiveness of ranibizumab in treatment of diabetic macular oedema (DME) causing visual impairment: evidence from the RESTORE trial
Source: PubMed Central journal article supplement — Br J Ophthalmol. 2012 Mar 7;96(5):688–93. doi: 10.1136/bjophthalmol-2011-300726 (PMC3329632; doi:10.1136/bjophthalmol-2011-300726), 2012-03-07

# Supplementary Figure 1

Probabilistic sensitivity analysis: scatter plot of ranibizumab monotherapy versus laser monotherapy

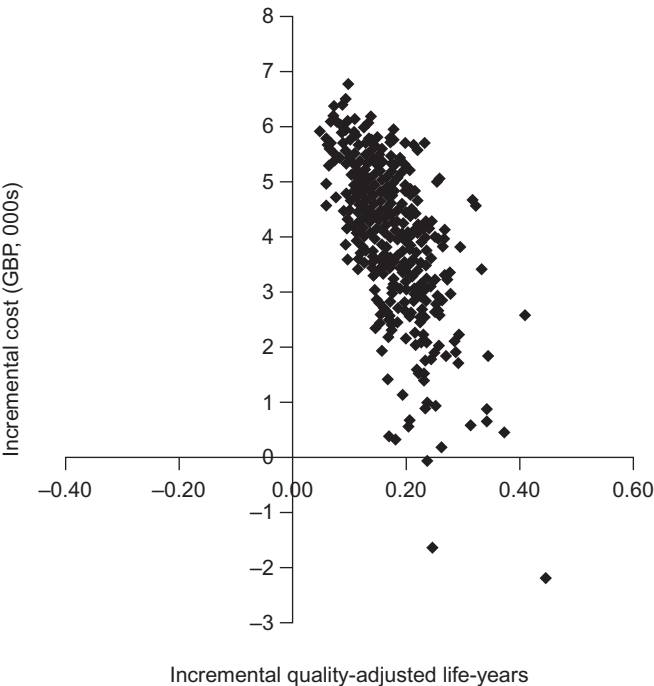

Supplement: bjophthalmol-2011-300726-s2.pdf [file bjophthalmol-2011-300726-s2.pdf]
