# Supplementary material for: Cost-effectiveness of ranibizumab in treatment of diabetic macular oedema (DME) causing visual impairment: evidence from the RESTORE trial
Source: PubMed Central journal article supplement — Br J Ophthalmol. 2012 Mar 7;96(5):688–93. doi: 10.1136/bjophthalmol-2011-300726 (PMC3329632; doi:10.1136/bjophthalmol-2011-300726), 2012-03-07
Supplement: bjophthalmol-2011-300726-s4.pdf [file bjophthalmol-2011-300726-s4.pdf]

**Table 1** Utility by BCVA in treated eye

| <b>Health state<br/>defined by<br/>BCVA category<br/>(letters; treated<br/>eye)</b> | <b>RESTORE*</b>            | <b>Lloyd <i>et al</i><sup>†[13]</sup></b> | <b>Brown <i>et al</i><sup>§[14]</sup></b> |
|-------------------------------------------------------------------------------------|----------------------------|-------------------------------------------|-------------------------------------------|
|                                                                                     | <b>Mean utility (SE)</b>   |                                           |                                           |
| <b>1:</b> 86–100                                                                    | 0.860 <sup>‡</sup> (0.034) | 0.830                                     | 0.839                                     |
| <b>2:</b> 76–85                                                                     | 0.860 (0.014)              | 0.750                                     | 0.839                                     |
| <b>3:</b> 66–75                                                                     | 0.813 (0.012)              | 0.750                                     | 0.783                                     |
| <b>4:</b> 56–65                                                                     | 0.802 (0.014)              | 0.715                                     | 0.783                                     |
| <b>5:</b> 46–55                                                                     | 0.770 (0.018)              | 0.680                                     | 0.732                                     |
| <b>6:</b> 36–45                                                                     | 0.760 (0.027)              | 0.680                                     | 0.681                                     |
| <b>7:</b> 26–35                                                                     | 0.681 (0.053)              | 0.530                                     | 0.630                                     |
| <b>8:</b> 0–25                                                                      | 0.547 (0.083)              | 0.340                                     | 0.579                                     |
