# Supplementary material for: Cost-effectiveness of ranibizumab in treatment of diabetic macular oedema (DME) causing visual impairment: evidence from the RESTORE trial
Source: PubMed Central journal article supplement — Br J Ophthalmol. 2012 Mar 7;96(5):688–93. doi: 10.1136/bjophthalmol-2011-300726 (PMC3329632; doi:10.1136/bjophthalmol-2011-300726), 2012-03-07
Supplement: bjophthalmol-2011-300726-s5.pdf [file bjophthalmol-2011-300726-s5.pdf]

**Table 2** Key model inputs and assumptions

| <b>Time period</b> | <b>Model input</b>  | <b>Combination therapy</b>                                                                               | <b>Ranibizumab monotherapy</b>                                         | <b>Laser monotherapy</b>                                                   | <b>Source</b>                                  |
|--------------------|---------------------|----------------------------------------------------------------------------------------------------------|------------------------------------------------------------------------|----------------------------------------------------------------------------|------------------------------------------------|
| Year 1             | BCVA progression    | RESTORE trial data, adjusted for drop-out rates                                                          | RESTORE trial data, adjusted for drop-out rates                        | RESTORE trial data, adjusted for drop-out rates                            | RESTORE data on file                           |
|                    | Treatment frequency | 7 injections + 2 laser sessions, as in RESTORE; drop-outs continue in standard care (i.e. laser therapy) | 7 injections; drop-outs continue in standard care (i.e. laser therapy) | 2 laser sessions; drop-outs continue in standard care (i.e. laser therapy) | RESTORE data on file                           |
|                    | Monitoring visits   | 12                                                                                                       | 12                                                                     | 4                                                                          | SmPC and expert interview (data on file)       |
|                    | Adverse events      | Negligible                                                                                               | Negligible                                                             | Negligible                                                                 | RESTORE data on file                           |
| Year 2             | BCVA progression    | Equal rates of improvement and worsening (3% in 3 months)                                                | Equal rates of improvement and worsening (3% in 3 months)              | Equal rates of improvement and worsening (3% in 3 months)                  | Supported by DRCR.net and RESTORE data on file |
|                    | Treatment frequency | 2 injections + 1 laser session                                                                           | 3 injections (no laser)                                                | 1 laser session                                                            | Supported by DRCR.net                          |

|          | frequency           | session                                                                               |                                                                                       |                                                                                       |                                                                                   |
|----------|---------------------|---------------------------------------------------------------------------------------|---------------------------------------------------------------------------------------|---------------------------------------------------------------------------------------|-----------------------------------------------------------------------------------|
|          | Monitoring visits   | 8                                                                                     | 10                                                                                    | 4                                                                                     | Assumption                                                                        |
| Year 3   | BCVA progression    | Constant rates of change of BCVA with a majority of patients having a decline in BCVA | Constant rates of change of BCVA with a majority of patients having a decline in BCVA | Constant rates of change of BCVA with a majority of patients having a decline in BCVA | Calibrated to WESDR data (Supplementary Methods)                                  |
|          | Treatment frequency | No additional ranibizumab; laser therapy as required                                  | No additional ranibizumab; laser therapy as required                                  | Laser therapy as required                                                             | Assumption                                                                        |
|          | Monitoring visits   | 4                                                                                     | 4                                                                                     | 4                                                                                     | Assumption                                                                        |
| Any year | Cost of blindness   | When BCVA $\leq 35$ letters is reached in better-seeing eye                           | When BCVA $\leq 35$ letters is reached in better-seeing eye                           | When BCVA $\leq 35$ letters is reached in better-seeing eye                           | Adapted from costing approach by Meads <i>et al.</i> [16] (Supplementary Table 5) |
