# Supplementary material for: Cost-effectiveness of ranibizumab in treatment of diabetic macular oedema (DME) causing visual impairment: evidence from the RESTORE trial
Source: PubMed Central journal article supplement — Br J Ophthalmol. 2012 Mar 7;96(5):688–93. doi: 10.1136/bjophthalmol-2011-300726 (PMC3329632; doi:10.1136/bjophthalmol-2011-300726), 2012-03-07
Supplement: bjophthalmol-2011-300726-s6.pdf [file bjophthalmol-2011-300726-s6.pdf]

**Table 3.** Cost-effectiveness – base-case and sensitivity analyses\*

| <b>Assumption/parameter</b>                                    | <b>Base case</b> | <b>Sensitivity analyses</b>     | <b>Incremental cost</b> | <b>Incremental QALY</b> | <b>ICER</b>        | <b>ICER (% change)</b> |
|----------------------------------------------------------------|------------------|---------------------------------|-------------------------|-------------------------|--------------------|------------------------|
| <b><i>Ranibizumab monotherapy versus laser monotherapy</i></b> |                  |                                 |                         |                         |                    |                        |
| Base case                                                      | –                | –                               | £4,191                  | 0.17                    | £24,028            | –                      |
| Discount rate of future costs and benefits                     | 3.50%            | 0–5%                            | £3,593–4,383            | 0.16 to 0.16            | £17,051–27,042     | –29% to +13%           |
| Time horizon                                                   | 15 years         | 10–20 years                     | £4,738–£3,991           | 0.14 to 0.19            | £33,139 to £21,343 | +38% to –11%           |
| Cost of blindness                                              | £6477            | –25% to +25%                    | £4,868– 3,515           | 0.17 to 0.17            | £27,907–20,150     | +16% to –16%           |
| Long-term progression of VA                                    | Declining        | Constant or increasing          | £4,487– 4,693           | 0.17 to 0.17            | £26,198–28,413     | +9% to +18%            |
| Total number of ranibizumab injections                         | 10               | –4 injections to + 4 injections | £2,171– 6,774           | 0.17 to 0.17            | £12,446–38,836     | –48% to +62%           |
| Baseline age                                                   | 63 years         | 58 years                        | £3,767                  | 0.20                    | £19,259            | –20%                   |
| Source of utilities                                            | RESTORE          | Lloyd <i>et al.</i> [13]        | £4,191                  | 0.22                    | £19,238            | –20%                   |
|                                                                | RESTORE          | Brown <i>et al.</i> [14]        | £4,191                  | 0.19                    | £21,953            | –9%                    |
| <b><i>Combination therapy versus laser monotherapy</i></b>     |                  |                                 |                         |                         |                    |                        |
| Base case                                                      | –                | –                               | £4,695                  | 0.13                    | £36,106            | –                      |
| Discounting of future costs and benefits                       | 3.50%            | 0–5%                            | £4,271–4,828            | 0.16 to 0.12            | £26,957–40,096     | –25% to +11%           |
| Time horizon                                                   | 15 years         | 10–20 years                     | £5,133–4,507            | 0.10 to 0.13            | £49,294–34,135     | +37% to –5%            |
| Cost of blindness                                              | £6477            | –25% to +25%                    | £5,050–4,340            | 0.13 to 0.13            | £38,833–33,378     | +8% to –8%             |
| Long-term progression of VA                                    | Declining        | Constant or increasing          | £5,091–5,276            | 0.13 to 0.12            | £40,852–44,071     | +13% to +22%           |
| Total number of ranibizumab injections                         | 9                | –4 injections to + 4 injections | £3,165–7,260            | 0.13 to 0.13            | £24,340–55,828     | –33% to +55%           |
| Baseline age                                                   | 63 years         | 58 years                        | £4,393                  | 0.15                    | £29,952            | –17%                   |
| Source of utilities                                            | RESTORE          | Lloyd <i>et al</i> [13]         | £4,695                  | 0.16                    | £28,778            | –20%                   |
